# Supplementary material
Source: publisher site journal article supplement (https://www.dovepress.com/article/414586)
Supplement: Supplementary file 1 [file get_supplementary_file.php]

**Electronic Supplementary Information**

*1.1 Optimization of medium and* *slice-making method*

In high-volume hematology laboratories, automated slide-making methods with little manual intervention are expected to reduce the adverse impacts on leukemia diagnosis [1-3]. A homogeneous, reproducible and simple slice-making method is helpful for the preparation of high-quality slides [3-4]. The slice-making methods, including drop-casting method, centrifugation method and push method, were studied. Specifically, for drop-casting method, 10 μL of cell suspension (5×106/mL) was dropped on the slide and spread by the pipette tip. For centrifugation method, the cell suspension (1 mL, 5×104/mL) was directly centrifuged to adhesive microscope slides. For push method, 10 μL of cell suspension (5×106/mL) was dropped on the slide, then using another sliding plate with smooth edge to contact the suspension and maintaining a 30-45° angle with the slide. Then, pushing the sliding plate quickly to spread the suspension along the pusher in a linear manner.

**
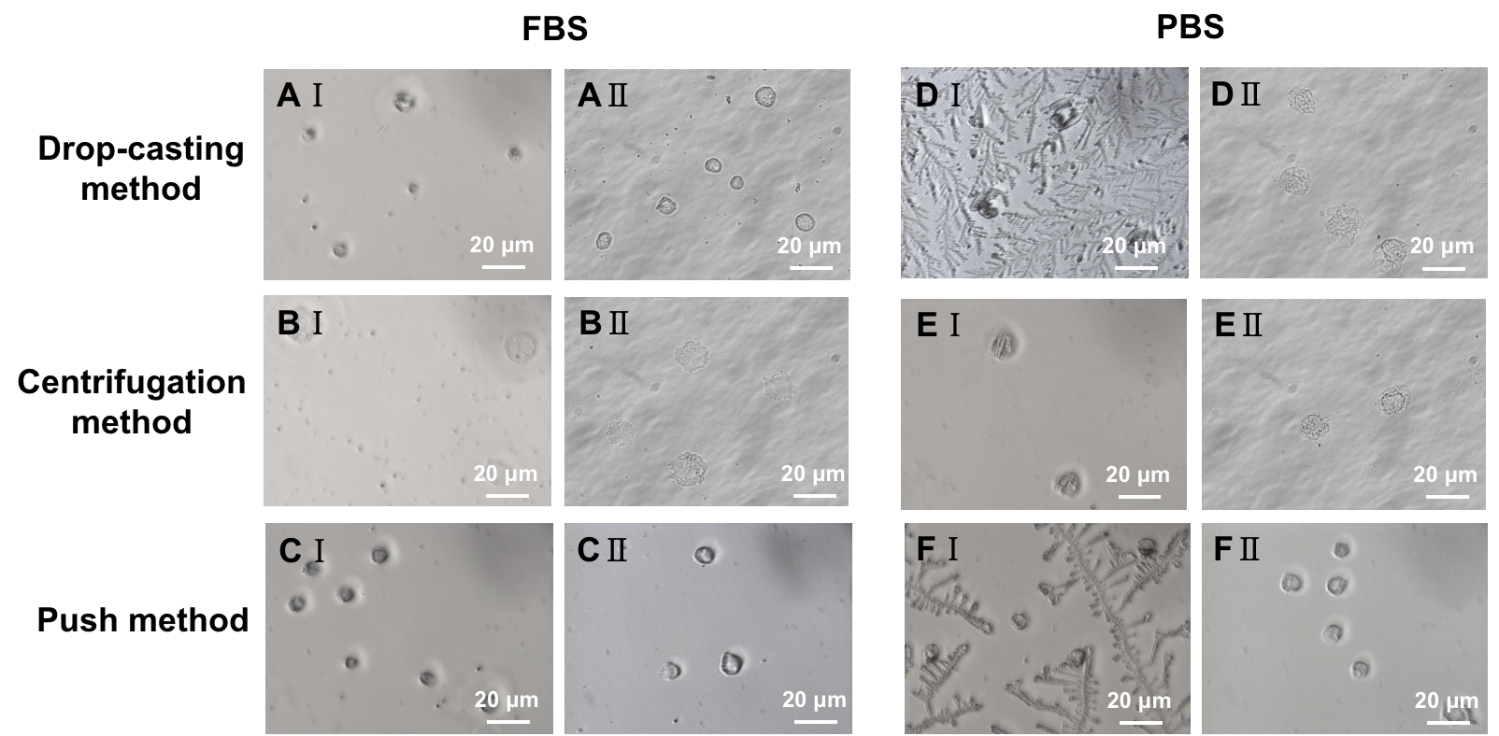
**

**G**

**Fig. S1** Bright-field optical images of DLBCL cells in FBS before (AⅠ-CⅠ) and after water rinsing (AⅡ-CⅡ) with different treatment. Bright-field optical images of DLBCL cells in PBS before (DⅠ-FⅠ) and after water rinsing (DⅡ-FⅡ) with different treatment. (G) Statistical box plots of DLBCL cells in FBS and PBS with different treatment.

*2.2 Cell imaging using the oil immersion lens of the microscope*

To decrease the effect on the overall diagnosis, the samples could be observed using the oil immersion lens of the microscope. As shown in Fig. S2, the fluorescence intensity was amplified and cell morphology was maintained well under the oil immersion lens of the microscope. Also, Liu *et al.* developed a method for the separation and detection of ovarian cancer cells from female whole blood using folic acid conjugated magnetic nanoparticles under the oil immersion lens of the microscope [5]. Hence, the overall diagnosis will not be influenced.


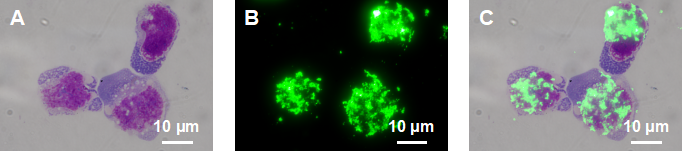


**Fig. S2** Bright-field optical image (A), fluorescence image (B) and merged image (C) of DLBCL cells using the oil immersion lens of the microscope.

**Table S1** Clinical data of three patients.

| Samples | Type | Clinical diagnosis | Neutrophilic metamyelocyte | Band form neutrophilic granulocyte | Neutrophilic segmented granulocyte | Eosinophilic granulocyte | Lymphocyte | Primitive monocyte | Naive monocyte | Monocyte | Lymphoma cell |
| --- | --- | --- | --- | --- | --- | --- | --- | --- | --- | --- | --- |
| A | Blood | Acute monocytic leukaemia (subtype *M5b*) | 1% | 2% | 2% | − | 29% | 2% | 52% | 12% | − |
| B | Bone marrow | Small B-cell lymphoma/leukemia (non CLL) | − | − | − | 2% | 9% | − | − | − | 89% |
| C | Blood | Acute monocytic leukaemia (subtype *M5b*) | − | − | 19% | − | 5% | 10% | − | 66% | − |

**Table S2** Comparison of various methods for diagnosis of leukemia.

| Methods | Characteristics | Reference |
| --- | --- | --- |
| Bone marrow aspiration smear cytomorphology | Bone marrow particles were aspirated and spread on slides, stained by the Wright-Giemsa or other techniques for microscopic examination. It is a simple, reliable and rapid method of marrow evaluation. | [6-7] |
| Bone marrow trephine biopsy histopathology | Biopsies were fixed by using 10% neutral buffered formalin. About 4–6 μm thick sections were cut and stained with hematoxylin and eosin for microscopic examination, which providing excellent appreciation of spatial relationships between cells and of overall bone marrow structure. Biopsy is a painful procedure and its processing takes at least 48–72 h. | [7] |
| Immunohistochemistry | Applied to bone marrow (BM) core biopsy specimens and BM aspirate clot sections, is an integral part of BM investigation and is often followed by ancillary studies. Immunohistochemistry provides *in situ* coupling of morphological assessment and immunophenotype. | [8] |
| Chromosome banding analysis | Overview of whole karyotype provides an overall evaluation of the whole genome and helps direct further analysis (specific probes for FISH and/or PCR). This method requires fresh tissues and highly skilled personnel. | [9] |
| Fluorescence *in situ* hybridisation (FISH) | FISH uses test probes against target DNA in the nucleus of interphase cells or metaphase chromosomes. FISH allows the analysis of specific DNA changes in cells or intact chromosomes and does not require metaphase chromosomes. It is a sensitive and valuable method that enables screening for the recurrent chromosomal aberrations in hematologic disorders. | [10] |
| Multiplex FISH (M-FISH) | Originally designed to generate 24-color karyotyping, a multichromosomal paiting technique, that allows for the simultaneous visualization of all chromosomes of metaphase in a single hybridization step. | [11] |
| Polymerase chain reaction (PCR) | It targets a segment of DNA and produces multiple copies (usually between 107-1011) of DNA region of interest. Three major steps in PCR include denaturation of double-stranded DNA into single stranded DNA, hybridization of oligonucleotide primers to both ends of target sequence, and a synthesis achieved by addition of four nucleotide base and a Taq polymerase. A PCR reaction usually involves 30-40 cycles. PCR provides unlimited amounts of precise genetic material for diagnosis. | [12] |
| Nested PCR | Nested PCR involves two PCR reactions for a single locus. It uses two sets of primers, the second of which lies within the first set of primers (the first target is longer and the second is shorter) ,which increases both sensitivity and specificity. Because of the high sensitivity of this methodology, it is used for a target expressed at very low level. | [13] |
| Reverse transcriptase polymerase chain reaction (RT-PCR) | RT-PCR methodology amplifies RNA and consists of two major steps: first, it employs an enzyme, reverse transcriptase,which converts RNA into the single-stranded complementary DNA,which in the second step serves as a template for conventional PCR. | [14] |
| Real-time quantitative PCR (RQ-PCR) | RQ-PCR allows simultaneous amplification and detection of PCR products in a single reaction tube. The reaction is monitored in real time after each cycle of amplification by computer software permitting both detection and quantification of PCR products. | [15] |
| Allele-specific PCR (AS-PCR) | This target amplification method is based on positioning the 3’ base of a PCR primer to match one single nucleotide polymorphisms allele and accurately extend only the correctly matched primer under stringent conditions. AS-PCR has the advantage of combining the amplification and detection events, with no additional probes or enzymes required. | [16] |
| Droplet digital PCR (ddPCR) | Droplet digital PCR is a novel absolute quantitative technique that divides the reaction system into thousands of units. The fluorescence signal of each reaction unit is detected,and the original concentration is calculated according to a Poisson distribution. | [17] |
| Flow cytometry (FC) | FC measures simultaneously several surface and/or intracytoplasmic markers on a single cell, allowing for an accurate phenotypic characterization of analyzed population(s). Analysis with panels of antibodies allows for separation of hematologic tumors into very precise subtypes with different prognosis and treatment requirements. Monoclonal antibodies used in FC are conjugated with fluorochromes, which are excited or stimulated by laser(s) in a flow cytometer. In the FC protocol, the sample is incubated with antibodies, followed by red blood cell lysis, washing, fixation in paraformaldehyde, and FC analysis. Data are displayed in a singleparameter histogram and two-parameter dot plots. | [18] |
| Multicolor flow cytometry | Immunophenotypes of the bone marrow cells from AML patients were assessed using eight-color flow cytometry on FACSCanto II (BD Biosciences) as part of the routine clinical workup. Briefly, BM cells that were stained with monoclonal antibodies were acquired on FACSCanto II instruments (BD Biosciences). The data were interpreted by in-house board certified hematopathologists. | [19] |
| Mass cytometry | Is a single-cell–based platform that utilizes antibodies conjugated to rare heavy metal ions for analysis of cellular proteins by a time-of-flight mass spectrometer. This new technology allows for the evaluation of >40 simultaneous cellular parameters in a single sample. | [20] |
| Comparative genomic hybridization (CGH) | Based on the comparison of two genomic DNA populations, an analyzed sample (tumor) and a karyotypically normal reference. Differentially labeled test DNA from a tumor and control (normal) reference DNA (metaphase chromosomes from blood lymphocytes) are hybridized simultaneously onto normal human metaphase chromosomes, competing for the same targets. The hybridization products are detected with two different fluorochromes (usually red and green). The fluorescence signal (ratio of the green and red fluorescence) of the tumor sample is compared that of a control cell. Changes in the ratio of the intensities of the two fluorochromes as compared to the expected one-to-one ratio seen in the control sample indicates regions of gain or loss of DNA sequences. | [21] |
| Array CGH | CGH has been largely superseded by DNA microarray formats (array CGH or aCGH) which offers considerable improvements in resolution and provides mapping of the copy number directly ontothe genome sequence. This involves the same competitive hybridization of a test and reference genome as cCGH, but the hybridization template comprises of a nucleic acid sequence of known genomic location spotted onto an array slide, used to assess the genomic location of the copy number changes in the test DNA sample. | [22] |
| Single nucleotide polymorphism (SNP) arrays | SNP array offer the ability to define simultaneously the copy number changes and LOH (loss of heterozygosity) events. Two major technologies which allow simultaneous genotyping of over half a million SNPs across the genome include Affymetrix SNP arrays with oligonucleotide probes spotted on gene chips (adopted from the microarray hybridization chip technology) and Illumina arrays, in which allele-specific oligonu-cleotide probes are adsorbed to microbeads arranged on a microarray. | [23] |
| DNA microarrays | A DNA chip or microarray consists of thousands of fragments of DNA bound to a slicon chip. The methodology involves of the extraction of RNA from a sample, its conversion to cDNA by labeled probes, hybridization of these labeled cDNAs, and laser scanning of the hybridized array. The automated examination of a chip delivers the information about thousands of probe sites. | [24] |
| Maxam and Gilbert sequencing | Also called the partial chemical degradation method, utilizes chemicals that target specific, individual purines or pyrimidines to cleave the radiolabeled DNA backbone into fragments. The DNA is labelled with radioactive 32P at the 5’ end. Next, specific chemicals are used to modify the nucleotides. For example, hydrazine removes the nitrogenous base from cytosine and thymine, but in the presence of high-salt concentrations, it preferentially cleaves cytosine. Formic acid is used to methylate adenine and guanine is methylated by dimethyl sulfate. Following base modification, piperidine is used to cleave the sugar-phosphate backbone, producing fragments that are analyzed using polyacrylamide gel electrophoresis. | [25] |
| Sanger sequencing | With the development of Sanger’s ‘chain-termination’ or dideoxy technique. The chain-termination technique makes use of chemical analogues of the deoxyribonucleotides (dNTPs) that are the monomers of DNA strands. Dideoxynucleotides (ddNTPs) lack the 3’ hydroxyl group that is required for extension of DNA chains, and therefore cannot form a bond with the 5’ phosphate of the next dNTP. Mixing radiolabelled ddNTPs into a DNA extension reaction at a fraction of the concentration of standard dNTPs results in DNA strands of each possible length being produced, as the dideoxy nucleotides get randomly incorporated as the strand extends, halting further progression. By performing four parallel reactions containing each individual ddNTP base and running the results on four lanes of a polyacrylamide gel, one is able to use autoradiography to infer what the nucleotide sequence in the original template was, as there will a radioactive band in the corresponding lane at that position of the gel. | [26] |
| Chromatin immunoprecipitation (ChIP) | Chromatin immunoprecipitation (ChIP) is a powerful technique for analyzing histone modifications as well as binding sites for proteins that bind either directly or indirectly to DNA. These techniques are based on the ability of formaldehyde to form protein–protein and protein–DNA Schiff’s base cross-linkages that can be reversed by acid or increased temperature. The immunoprecipitated DNA can then be detected by a variety of ways, including Southern blotting, conventional PCR, quantitative PCR, hybridization to arrays (“Chip-on-chip”), or cloning and sequencing (ChIP-serial analysis of gene expression –“ChIP-SAGE”). Although straightforward in principle, the ChIP technique is dependent on many variables, such as the specific antibody, cross-linking conditions, and sonication conditions that must be empirically determined. | [27] |
| Next-generation sequencing (NGS) | NGS relies on standard sequencing approaches from Sanger techniques, but there have been innovative improvements in other ways allowing millions of parallel sequencing reactions to be conducted. NGS can sequence smaller subclones at a high resolution and can identify genetic differences as the sequence of each base can be identified and numerous target loci (several genes) are detectable for simultaneous analysis. In addition, NGS is a high-throughput sequencing technology with higher flux and sensitivity, faster speed and lower cost. | [28] |
| Single-cell DNA-seq (scDNA-seq) | Single-cell DNA-seq encompasses a suite of technologies and approaches that interrogate DNA at the level of single cells. These technologies contrast with standard DNA sequencing, also known as “bulk” sequencing, that homogenizes the DNA content of usually thousands to millions of cells. Much like the voice of a single individual or a small number of individuals can be “drowned out” in a large crowd, genomic signals (variants, DNA modifications, or structural properties of DNA) that are present in only one or a small number of cells in a sample may be undetectable without interrogating single-cell genomes. The development of scDNA-seq methods has at every step been motivated by biological questions that seek to explore this cellular genomic diversity that would otherwise be missed by bulk sequencing. | [29] |
| Single-cell mRNA-seq of Tang’s method | A single cell is picked and directly lysed, and mRNA is reverse-transcribed into cDNA by using an oligo-dT primer with an anchor sequence (UP1) in cell lysate.Free primers are removed by exonuclease I, and a poly(A) tail is added to the 30-end of the first strand of cDNA by terminal deoxynucleotidyl transferase. The second strand of cDNA is synthesized using an oligo-dT primer with another anchor sequence (UP2), and cDNA is evenly amplified by PCR using the UP1 and UP2 primers. The resulting amplified cDNA is adequate for constructing a library that can be used in nextgeneration sequencing. | [30] |
| Degenerate oligonucleotide–primed polymerase chain reaction (DOP-PCR) | The principle of DOP-PCR is to use degenerate primers containing a random six-base sequence at the 3’ end and a fixed sequence at the 5’ end. For the initial amplification, the random primers bind to the DNA template at a low annealing temperature (*ca.* 30℃). Strand extension is then achieved at a raised temperature. During the second stage of PCR amplification, the previous products are amplified with a primer targeting the 5’ fixed sequence at a higher annealing temperature. The concentrations of the primers and polymerase directly affect the result of DOP-PCR. DOP-PCR has been used to amplify picogram quantities of human genomic DNA for genotypic analyses. DOP-PCR can be well suited for measuring CNVs on a large genomic scale with large bin sizes (1 million bases). | [31] |
| Multiple displacement amplification (MDA) | MDA was developed in 2001 by Lasken and coworkers using a random hexamer as a primer and φ29 DNA polymerase, a highly processive DNA polymerase with strong strand displacement activity. φ29 has a high replication fidelity because of its 3'→5' exonuclease activity and proofreading activity. Under isothermal conditions, MDA extends the random primers and produces branched structures, which are extended by other primers and eventually form multibranched structures. The DNA fragments are 50–100 kb long. which when coupled with the high fidelity of the polymerase allows for comprehensive Single Nucleotide Polymorphism (SNP) genotyping. | [32] |
| Multiple annealing and looping-based amplification cycles (MALBAC) | MALBAC is based upon strand displacement pre-amplification that generates amplicons with complementary ends. This complementarity in theory mediates molecule looping to prevent further amplification. Pre-amplification is then followed by a PCR reaction to yield the resultant library. MALBAC has been used to detect SNVs and CNVs of single cells, exhibiting unparalleled advantages in detecting CNVs than other whole genome amplification methods. | [33] |
| Single-molecule real-time (SMRT) sequencing | SMRT sequencing was pioneered by Nanofluidics, Inc. and commercialized by Pacific Biosciences. Template preparation involves ligation of single-stranded,hairpin adapters onto the ends of digested DNA or cDNA molecules,generating a capped template (SMRT-bell). By using a strand displacing polymerase, the original DNA molecule can be sequenced multiple times, thereby increasing accuracy. Importantly, clonal amplification is avoided,allowing direct sequencing of native, and potentially modified, DNA. DNA synthesis occurs in zeptoliter-sized chambers, called zero-mode waveguides (ZMW), in which a single polymerase is immobilized at the bottom of the chamber. The physics of these chambers reduces background noise such that phosphate-labeled versions of all four nucleotides can be present simultaneously. Thus, olymerization occurs continuously, and the DNA sequence can be read in real-time from the fluorescent signals recorded in a video. | [34] |
| Microscopic images automatic identification system | It performs microscopic images acquiring from blood smears, image processing, color segmentation strategy is applied for segmenting white blood cells from other blood components and then discriminative features, i.e., irregularity, nucleus-cytoplasm ratio, Hausdorff dimension, shape, color, and texture features are extracted from the entire nucleus in the whole images containing multiple nuclei. Images are classified to cancerous and noncancerous images by binary support vector machine (SVM) classifier with 10-fold cross validation technique. Cancerous images are also classified into their prevalent subtypes by multi‑SVM classifier. The results show that the proposed algorithm has achieved an acceptable performance for diagnosis of AML and its common subtypes. | [35] |
| Slide immunophenotype-cytomorphology synchronous observation | Leukemia cells labeled with UCNPs-CD immunoflurescence probes were transferred to slide by centrifugation method. After Wright’s staining, cell morphology observations were performed under the microscope, and target cells were selected according to the cell morphological features. Switching to 980 nm laser light source, immunophenotyping of the target cells was observed from the same microscopic field of view, exhibiting unparalleled advantages in combining cytomorphology with immunophenotyping for comprehensive leukemia diagnosis. | This work |

**Reference**

[1] Lin E, Fuda F, Luu HS, Cox AM, Fang F, Feng J, Chen M. Digital pathology and artificial intelligence as the next chapter in diagnostic hematopathology. *Semin. Diagn. Pathol.* 2023;40(2):88-94. doi: 10.1053/j.semdp.2023.02.001

[2] Kratz A, Lee SH, Zini G, Riedl JA, Hur M, Machin S. Digital morphology analyzers in hematology: ICSH review and recommendations. *Int. J. Lab. Hematol.* 2019;41(4):437-447. doi: 10.1111/ijlh.13042

[3] Hur M, Cho JH, Kim H, Hong MH, Moon HW, Yun YM, Kim JQ. Optimization of laboratory workflow in clinical hematology laboratory with reduced manual slide review: Comparison between Sysmex XE-2100 and ABX Pentra DX120. *Int. J. Lab. Hematol.* 2011;33(4):434-440. doi: 10.1111/j.1751-553X.2011.01306.x

[4] Da Costa L. Digital image analysis of blood cells. *Clin. Lab. Med.* 2015;35(1):105-122. doi: 10.1016/j.cll.2014.10.005

[5] Liu W, Nie L, Li F, Aguilar ZP, Xu H, Xiong Y, Fu F, Xu H. Folic acid conjugated magnetic iron oxide nanoparticles for nondestructive separation and detection of ovarian cancer cells from whole blood. *Biomater. Sci-UK* 2016;4(1):159-166. doi: 10.1039/c5bm00207a

[6] Riley RS, Hogan TF, Pavot DR, Forysthe R, Massey D, Smith E, Wright L, Ben-Ezra JM. A pathologist's perspective on bone marrow aspiration and biopsy: I. Performing a bone marrow examination. *J. Clin. Lab. Anal.* 2004;18(2):70-90. doi: 10.1002/jcla.20008

[7] Gilotra M, Gupta M, Singh S, Sen R. [Comparison of bone marrow aspiration cytology with bone marrow trephine biopsy histopathology: An observational study](https://pubmed.ncbi.nlm.nih.gov/28706388/). *J. Lab. Physicians.* 2017;9(3):182-189. doi: 10.4103/JLP.JLP_117_16

[8] Torlakovic EE, Brynes RK, Hyjek E, Lee SH, Kreipe H, Kremer M, McKenna R, Sadahira Y, Tzankov A, Reis M, Porwit A. ICSH guidelines for the standardization of bone marrow immunohistochemistry. *Int. J. Lab. Hematol.* 2015;37(4):431-449. doi: 10.1111/ijlh.12365

[9] Baccarani M, Deininger MW, Rosti G, Hochhaus A, Soverini S, et al. European LeukemiaNet recommendations for the management of chronic myeloid leukemia. *Blood* 2013;122(6):872-884. doi: [10.1182/blood-2013-05-501569](https://doi.org/10.1182/blood-2013-05-501569)

[10] [Rack](https://pubmed.ncbi.nlm.nih.gov/?term=Rack%20KA%5BAuthor%5D) KA, [Berg](https://pubmed.ncbi.nlm.nih.gov/?term=van%20den%20Berg%20E%5BAuthor%5D) E, [Haferlach](https://pubmed.ncbi.nlm.nih.gov/?term=Haferlach%20C%5BAuthor%5D) C, [Beverloo](https://pubmed.ncbi.nlm.nih.gov/?term=Beverloo%20HB%5BAuthor%5D) HB, [Costa](https://pubmed.ncbi.nlm.nih.gov/?term=Costa%20D%5BAuthor%5D) D, [Espinet](https://pubmed.ncbi.nlm.nih.gov/?term=Espinet%20B%5BAuthor%5D) B, [Foot](https://pubmed.ncbi.nlm.nih.gov/?term=Foot%20N%5BAuthor%5D) N, [Jeffries](https://pubmed.ncbi.nlm.nih.gov/?term=Jeffries%20S%5BAuthor%5D) S, [Martin](https://pubmed.ncbi.nlm.nih.gov/?term=Martin%20K%5BAuthor%5D) K, [O’Connor](https://pubmed.ncbi.nlm.nih.gov/?term=O%E2%80%99Connor%20S%5BAuthor%5D) S, [Schoumans](https://pubmed.ncbi.nlm.nih.gov/?term=Schoumans%20J%5BAuthor%5D) J, [Talley](https://pubmed.ncbi.nlm.nih.gov/?term=Talley%20P%5BAuthor%5D) P, [Telford](https://pubmed.ncbi.nlm.nih.gov/?term=Telford%20N%5BAuthor%5D) N, [Stioui](https://pubmed.ncbi.nlm.nih.gov/?term=Stioui%20S%5BAuthor%5D) S, [Zemanova](https://pubmed.ncbi.nlm.nih.gov/?term=Zemanova%20Z%5BAuthor%5D) Z, [Hastings](https://pubmed.ncbi.nlm.nih.gov/?term=Hastings%20RJ%5BAuthor%5D) RJ. European recommendations and quality assurance for cytogenomic analysis of haematological neoplasms: reponse to the comments from the francophone group of hematological cytogenetics (GFCH). [*Leukemia*](https://www.ncbi.nlm.nih.gov/pmc/articles/PMC7387292/) 2020;34(8):2262-2264. doi: [10.1038/s41375-020-0736-x](https://doi.org/10.1038%2Fs41375-020-0736-x)

[11] [Tchinda](https://pubmed.ncbi.nlm.nih.gov/?sort=date&term=Tchinda+J&cauthor_id=15322432) J, [Neumann](https://pubmed.ncbi.nlm.nih.gov/?sort=date&term=Neumann+TE&cauthor_id=15322432) TE, [Volpert](https://pubmed.ncbi.nlm.nih.gov/?sort=date&term=Volpert+S&cauthor_id=15322432) S, [Berdel](https://pubmed.ncbi.nlm.nih.gov/?sort=date&term=Berdel+WE&cauthor_id=15322432) WE, [Büchner](https://pubmed.ncbi.nlm.nih.gov/?sort=date&term=B%C3%BCchner+T&cauthor_id=15322432) T, [Horst](https://pubmed.ncbi.nlm.nih.gov/?sort=date&term=Horst+J&cauthor_id=15322432) J. Characterization of chromosomal rearrangements in hematological diseases using spectral karyotyping. *Diagn. Mol. Pathol.* 2004;13(3):190-195. doi: 10.1097/01.pas.0000124338.49401.ef

[12] [Cavé](https://pubmed.ncbi.nlm.nih.gov/?term=Cav%C3%A9%20H%5BAuthor%5D) H. The polymerase chain reaction, so simple, so clever: The discovery that made minimal residual disease come true. [*Haematologica*](https://www.ncbi.nlm.nih.gov/pmc/articles/PMC9335092/)*.* 2022;107(8):1737-1738. doi: [10.3324/haematol.2022.281413](https://doi.org/10.3324%2Fhaematol.2022.281413)

[13] [Lee](https://pubmed.ncbi.nlm.nih.gov/?term=Lee%20D%5BAuthor%5D) D, [Suh](https://pubmed.ncbi.nlm.nih.gov/?term=Suh%20Y%5BAuthor%5D) YL, [Kang](https://pubmed.ncbi.nlm.nih.gov/?term=Kang%20SY%5BAuthor%5D) SY, [Park](https://pubmed.ncbi.nlm.nih.gov/?term=Park%20T%5BAuthor%5D) TI, [Jeong](https://pubmed.ncbi.nlm.nih.gov/?term=Jeong%20JY%5BAuthor%5D) JY, [Kim](https://pubmed.ncbi.nlm.nih.gov/?term=Kim%20S%5BAuthor%5D) SH. DH1 mutations in oligodendroglial tumors: Comparative analysis of direct sequencing, pyrosequencing, immunohistochemistry, nested PCR and PNA-mediated clamping PCR. [*Brain Pathol.*](https://www.ncbi.nlm.nih.gov/pmc/articles/PMC8029453/) 2013;23(3):285-293. doi: [10.1111/bpa.12000](https://doi.org/10.1111%2Fbpa.12000)

[14] [Liang](https://pubmed.ncbi.nlm.nih.gov/?term=Liang+DC&cauthor_id=12116073) DC, [Shih](https://pubmed.ncbi.nlm.nih.gov/?term=Shih+LY&cauthor_id=12116073) LY, [Yang](https://pubmed.ncbi.nlm.nih.gov/?term=Yang+CP&cauthor_id=12116073) CP, [Hung](https://pubmed.ncbi.nlm.nih.gov/?term=Hung+IJ&cauthor_id=12116073) IJ, [Chen](https://pubmed.ncbi.nlm.nih.gov/?term=Chen+SH&cauthor_id=12116073) SH, [Jaing](https://pubmed.ncbi.nlm.nih.gov/?term=Jaing+TH&cauthor_id=12116073) TH, [Liu](https://pubmed.ncbi.nlm.nih.gov/?term=Liu+HC&cauthor_id=12116073) HC, [Chang](https://pubmed.ncbi.nlm.nih.gov/?term=Chang+WH&cauthor_id=12116073) WH. Multiplex RT-PCR assay for the detection of major fusion transcripts in Taiwanese children with B-lineage acute lymphoblastic leukemia. *Med. Pediatr. Oncol.* 2002;39(1):12-17. doi: 10.1002/mpo.10092

[15] [Azad](https://pubmed.ncbi.nlm.nih.gov/?term=Azad%20N%5BAuthor%5D) NA, [Shah](https://pubmed.ncbi.nlm.nih.gov/?term=Shah%20Z%5BAuthor%5D) ZA, [Pandith](https://pubmed.ncbi.nlm.nih.gov/?term=Pandith%20A%5BAuthor%5D) AA, [Rasool](https://pubmed.ncbi.nlm.nih.gov/?term=Rasool%20R%5BAuthor%5D) R, [Jeelani](https://pubmed.ncbi.nlm.nih.gov/?term=Jeelani%20S%5BAuthor%5D) S. Real-time quantitative PCR: A reliable molecular diagnostic and follow-up tool for ‘minimal residual disease’ assessment in chronic myeloid leukemia. *B*[*iosci. Rep.*](https://www.ncbi.nlm.nih.gov/pmc/articles/PMC6172424/) 2018;38(5):BSR20180974. doi: [10.1042/BSR20180974](https://doi.org/10.1042%2FBSR20180974)

[16] [Yu](https://pubmed.ncbi.nlm.nih.gov/?term=Yu%20CH%5BAuthor%5D) CH, [Chang](https://pubmed.ncbi.nlm.nih.gov/?term=Chang%20YH%5BAuthor%5D) YH, [Wang](https://pubmed.ncbi.nlm.nih.gov/?term=Wang%20DS%5BAuthor%5D) DS, [Jou](https://pubmed.ncbi.nlm.nih.gov/?term=Jou%20ST%5BAuthor%5D) ST, [Lin](https://pubmed.ncbi.nlm.nih.gov/?term=Lin%20CY%5BAuthor%5D) CY, [Lin](https://pubmed.ncbi.nlm.nih.gov/?term=Lin%20KH%5BAuthor%5D) KH, [Lu](https://pubmed.ncbi.nlm.nih.gov/?term=Lu%20MY%5BAuthor%5D) MY, [Wu](https://pubmed.ncbi.nlm.nih.gov/?term=Wu%20KH%5BAuthor%5D) KH, [Cheng](https://pubmed.ncbi.nlm.nih.gov/?term=Cheng%20CN%5BAuthor%5D) CN, [Chang](https://pubmed.ncbi.nlm.nih.gov/?term=Chang%20HH%5BAuthor%5D) HH, [Chou](https://pubmed.ncbi.nlm.nih.gov/?term=Chou%20SW%5BAuthor%5D) SW, [Su](https://pubmed.ncbi.nlm.nih.gov/?term=Su%20MY%5BAuthor%5D) MY, [Ni](https://pubmed.ncbi.nlm.nih.gov/?term=Ni%20YL%5BAuthor%5D) YL, [Xu](https://pubmed.ncbi.nlm.nih.gov/?term=Xu%20PY%5BAuthor%5D) PY, [Lin](https://pubmed.ncbi.nlm.nih.gov/?term=Lin%20DT%5BAuthor%5D) DT, [Lin](https://pubmed.ncbi.nlm.nih.gov/?term=Lin%20SW%5BAuthor%5D) SW, [Chen](https://pubmed.ncbi.nlm.nih.gov/?term=Chen%20HY%5BAuthor%5D) HY, [Yang](https://pubmed.ncbi.nlm.nih.gov/?term=Yang%20YL%5BAuthor%5D) YL. Allele-specific polymerase chain reaction can determine the diplotype of NUDT15variants in patients with childhood acute lymphoblastic leukemia. *Sci. Rep.* 2023;13:490. doi: 10.1038/s41598-023-27720-2

[17] [Pinheiro](https://pubs.acs.org/action/doSearch?field1=Contrib&text1=Leonardo+B.++Pinheiro) LB, [Coleman](https://pubs.acs.org/action/doSearch?field1=Contrib&text1=Victoria+A.++Coleman) VA, [Hindson](https://pubs.acs.org/action/doSearch?field1=Contrib&text1=Christopher+M.++Hindson) CM, [Herrmann](https://pubs.acs.org/action/doSearch?field1=Contrib&text1=Jan++Herrmann) J, [Hindson](https://pubs.acs.org/action/doSearch?field1=Contrib&text1=Benjamin+J.++Hindson) BJ, [Bhat](https://pubs.acs.org/action/doSearch?field1=Contrib&text1=Somanath++Bhat) S, [Emslie](https://pubs.acs.org/action/doSearch?field1=Contrib&text1=Kerry+R.++Emslie) KR. Evaluation of a droplet digital polymerase chain reaction format for DNA copy number quantification. *Anal. Chem.*2012;84(2):1003-1011. [doi: 10.1021/ac202578x](https://doi.org/10.1021/ac202578x)

[18] [Song](https://pubmed.ncbi.nlm.nih.gov/?term=Song%20JY%5BAuthor%5D) JY, [Filie](https://pubmed.ncbi.nlm.nih.gov/?term=Filie%20AC%5BAuthor%5D) AC, [Venzon](https://pubmed.ncbi.nlm.nih.gov/?term=Venzon%20D%5BAuthor%5D) D, [Stetler-Stevenson](https://pubmed.ncbi.nlm.nih.gov/?term=tevenson%20MS%5BAuthor%5D) M, [Yuan](https://pubmed.ncbi.nlm.nih.gov/?term=Yuan%20CM%5BAuthor%5D) CM. Flow cytometry increases the sensitivity of detection of leukemia and lymphoma cells in bronchoalveolar lavage specimens. [*Cytometry B Clin. Cytom.* 2012;82(5):305-312.](https://www.ncbi.nlm.nih.gov/entrez/eutils/elink.fcgi?dbfrom=pubmed&retmode=ref&cmd=prlinks&id=22837143) doi: [10.1002/cyto.b.21033](https://doi.org/10.1002%2Fcyto.b.21033)

[19] [Shah](https://pubmed.ncbi.nlm.nih.gov/?term=Shah+MV&cauthor_id=29448058) MV, [Jorgensen](https://pubmed.ncbi.nlm.nih.gov/?term=Jorgensen+JL&cauthor_id=29448058) JL, [Saliba](https://pubmed.ncbi.nlm.nih.gov/?term=Saliba+RM&cauthor_id=29448058) RM, [Wang](https://pubmed.ncbi.nlm.nih.gov/?term=Wang+SA&cauthor_id=29448058) SA, [Alousi](https://pubmed.ncbi.nlm.nih.gov/?term=Alousi+AM&cauthor_id=29448058) AM, [Andersson](https://pubmed.ncbi.nlm.nih.gov/?term=Andersson+BS&cauthor_id=29448058) BS, [Bashir](https://pubmed.ncbi.nlm.nih.gov/?term=Bashir+Q&cauthor_id=29448058) Q, [Ciurea](https://pubmed.ncbi.nlm.nih.gov/?term=Ciurea+SO&cauthor_id=29448058) SO, [Kebriaei](https://pubmed.ncbi.nlm.nih.gov/?term=Kebriaei+P&cauthor_id=29448058) P, [Marin](https://pubmed.ncbi.nlm.nih.gov/?term=Marin+D&cauthor_id=29448058) D, [Patel](https://pubmed.ncbi.nlm.nih.gov/?term=Patel+KP&cauthor_id=29448058) KP, [Popat](https://pubmed.ncbi.nlm.nih.gov/?term=Popat+UR&cauthor_id=29448058) UR, [Rezvani](https://pubmed.ncbi.nlm.nih.gov/?term=Rezvani+K&cauthor_id=29448058) K, [Rondon](https://pubmed.ncbi.nlm.nih.gov/?term=Rondon+G&cauthor_id=29448058) G, [Shpall](https://pubmed.ncbi.nlm.nih.gov/?term=Shpall+EJ&cauthor_id=29448058) EJ, [Champlin](https://pubmed.ncbi.nlm.nih.gov/?term=Champlin+RE&cauthor_id=29448058) RE, [Oran](https://pubmed.ncbi.nlm.nih.gov/?term=Oran+B&cauthor_id=29448058) B. Early post-transplant minimal residual disease assessment improves risk stratification in acute myeloid leukemia. *Biol. Blood Marrow Transplant.*2018;24(7):1514-1520. doi: 10.1016/j.bbmt.2018.02.003

[20] Krams SM, Schaffert S, Lau AH, Martinez OM. Applying mass cytometry to the analysis of lymphoid populations in transplantation. *Am. J. Transplant.* 2017;17:1992-1999. doi: 10.1111/ajt.14145

[21] [Kallioniemi](https://pubmed.ncbi.nlm.nih.gov/?sort=date&term=Kallioniemi+A&cauthor_id=1359641) A, [Kallioniemi](https://pubmed.ncbi.nlm.nih.gov/?sort=date&term=Kallioniemi+OP&cauthor_id=1359641) OP, [Sudar](https://pubmed.ncbi.nlm.nih.gov/?sort=date&term=Sudar+D&cauthor_id=1359641) D, [Rutovitz](https://pubmed.ncbi.nlm.nih.gov/?sort=date&term=Rutovitz+D&cauthor_id=1359641) D, [Gray](https://pubmed.ncbi.nlm.nih.gov/?sort=date&term=Gray+JW&cauthor_id=1359641) JW, [Waldman](https://pubmed.ncbi.nlm.nih.gov/?sort=date&term=Waldman+F&cauthor_id=1359641) F, [Pinkel](https://pubmed.ncbi.nlm.nih.gov/?sort=date&term=Pinkel+D&cauthor_id=1359641) D. Comparative genomic hybridization for molecular cytogenetic analysis of solid tumors. *Science* 1992;258(5083):818-821. doi: 10.1126/science.1359641

[22] [Fiegler](https://pubmed.ncbi.nlm.nih.gov/?sort=date&term=Fiegler+H&cauthor_id=12619160) H, [Carr](https://pubmed.ncbi.nlm.nih.gov/?sort=date&term=Carr+P&cauthor_id=12619160) P, [Douglas](https://pubmed.ncbi.nlm.nih.gov/?sort=date&term=Douglas+EJ&cauthor_id=12619160) EJ, [Burford](https://pubmed.ncbi.nlm.nih.gov/?sort=date&term=Burford+DC&cauthor_id=12619160) DC, [Hunt](https://pubmed.ncbi.nlm.nih.gov/?sort=date&term=Hunt+S&cauthor_id=12619160) S, [Scott](https://pubmed.ncbi.nlm.nih.gov/?sort=date&term=Scott+CE&cauthor_id=12619160) CE, [Smith](https://pubmed.ncbi.nlm.nih.gov/?sort=date&term=Smith+J&cauthor_id=12619160) J, [Vetrie](https://pubmed.ncbi.nlm.nih.gov/?sort=date&term=Vetrie+D&cauthor_id=12619160) D, [Gorman](https://pubmed.ncbi.nlm.nih.gov/?sort=date&term=Gorman+P&cauthor_id=12619160) P, [Tomlinson](https://pubmed.ncbi.nlm.nih.gov/?sort=date&term=Tomlinson+IP&cauthor_id=12619160) IPM, [Carter](https://pubmed.ncbi.nlm.nih.gov/?sort=date&term=Carter+NP&cauthor_id=12619160) NP. DNA microarrays for comparative genomic hybridization based on DOP-PCR amplification of BAC and PAC clones. *Gene. Chromosome. Canc.* 2003;36(4):361-374. doi: 10.1002/gcc.10155

[23] [Dutt](https://pubmed.ncbi.nlm.nih.gov/?term=Dutt+A&cauthor_id=17133111) A, [Beroukhim](https://pubmed.ncbi.nlm.nih.gov/?term=Beroukhim+R&cauthor_id=17133111) R. Single nucleotide polymorphism array analysis of cancer. *Curr. Opin. Oncol.*2007;19(1):43-49. doi: 0.1097/CCO.0b013e328011a8c1

[24] [Kurian](https://pathsocjournals.onlinelibrary.wiley.com/authored-by/Kurian/Kathreena+M.) KM, [Watson](https://pathsocjournals.onlinelibrary.wiley.com/authored-by/Watson/Christine+J.) CJ, [Wyllie](https://pathsocjournals.onlinelibrary.wiley.com/authored-by/Wyllie/Andrew+H.) AH. DNA chip technology. *J. Pathol.* 1999;187(3):267-271. doi: 10.1002/(SICI)1096-9896(199902)187:3%3C267::AID-PATH275%3E3.0

[25] Maxam AM, Gilbert W. A new method for sequencing DNA. [*Proc. Natl. Acad. Sci.*](file:///C:\Users\KrishnamurtD\OneDrive%20-%20Informa%20plc\Desktop\4b4bd\414586%20Gao\Proc%20Natl%20Acad%20Sci)1977;74(2):560-564. [doi: 10.1073/pnas.74.2.560](https://doi.org/10.1073/pnas.74.2.560)

[26] Sanger F, Nicklen S, Coulson AR. DNA sequencing with chain-terminating inhibitors. *Proc. Natl. Acad. Sci*. 1977;74(12):5463-5467. doi: 10.1073/pnas.74.12.5463

[27] [Shivaswamy](https://pubmed.ncbi.nlm.nih.gov/?sort=date&term=Shivaswamy+S&cauthor_id=17309841) S, [Iyer](https://pubmed.ncbi.nlm.nih.gov/?sort=date&term=Iyer+VR&cauthor_id=17309841) VR. Genome-wide analysis of chromatin status using tiling microarrays. *Methods* 2007;41(3):304-311. doi: 10.1016/j.ymeth.2006.11.002

[28] [Zhu](https://pubmed.ncbi.nlm.nih.gov/?term=Zhu%20L%5BAuthor%5D) L, [Xie](https://pubmed.ncbi.nlm.nih.gov/?term=Xie%20S%5BAuthor%5D) S, [Yang](https://pubmed.ncbi.nlm.nih.gov/?term=Yang%20C%5BAuthor%5D) C, [Hua](https://pubmed.ncbi.nlm.nih.gov/?term=Hua%20N%5BAuthor%5D) N, [Wu](https://pubmed.ncbi.nlm.nih.gov/?term=Wu%20Y%5BAuthor%5D) Y, [Wang](https://pubmed.ncbi.nlm.nih.gov/?term=Wang%20L%5BAuthor%5D) L, [Ni](https://pubmed.ncbi.nlm.nih.gov/?term=Ni%20W%5BAuthor%5D) W, [Tong](https://pubmed.ncbi.nlm.nih.gov/?term=Tong%20X%5BAuthor%5D) X, [Fei](https://pubmed.ncbi.nlm.nih.gov/?term=Fei%20M%5BAuthor%5D) M, [Wang](https://pubmed.ncbi.nlm.nih.gov/?term=Wang%20S%5BAuthor%5D) S. Current progress in investigating mature T- and NK-Cell lymphoma gene aberrations by next-generation sequencing (NGS). [*Cancer Manag. Res.*](https://www.ncbi.nlm.nih.gov/pmc/articles/PMC8259727/) 2021;13:5275-5286. doi: [10.2147/CMAR.S299505](https://doi.org/10.2147%2FCMAR.S299505)

[29] Evrony GD, Hinch AG, Luo C. Applications of single-cell DNA sequencing. *Annu. Rev. Genomics. Hum. Genet.* 2021;22:171-197. doi:10.1146/annurev-annurevgenom-111320-090436

[30] Tang F, Barbacioru C, Wang Y, Nordman E, Lee C, Xu N, Wang X, Bodeau J, Tuch BB, Siddiqui A, Lao K, Surani MA. mRNA-Seq whole-transcriptome analysis of a single cell. *Nat. Methods*2009;6(5):377-382. doi: 10.1038/nmeth.1315.

[31] Cheung VG, Nelson SF. Whole genome amplification using a degenerate oligonucleotide primer allows hundreds of genotypes to be performed on less than one nanogram of genomic DNA. [*Proc. Natl. Acad. Sci*](https://www.ncbi.nlm.nih.gov/pmc/articles/PMC26194/)*.*1996;93(25):14676-14679. doi: [10.1073/pnas.93.25.14676](https://doi.org/10.1073%2Fpnas.93.25.14676)

[32] Dean FB, Nelson JR, Giesler TL, Lasken RS. Rapid amplification of plasmid and phage DNA using Phi 29 DNA polymerase and multiply-primed rolling circle amplification. *Genome Res.* 2001;11(6):1095-1099. doi: 10.1101/gr.180501

[33] Zong C, Lu S, Chapman AR, Xie XS. Genome-wide detection of single-nucleotide and copy-number variations of a single human cell. *Science* 2012;338(6114):1622-1626. [doi: 10.1126/science.1229164](https://doi.org/10.1126/science.1229164)

[34] Reuter JA, Spacek DV, Snyder MP. High-throughput sequencing technologies. [*Mol. Cell* 2015;58(4):586-597.](https://www.ncbi.nlm.nih.gov/entrez/eutils/elink.fcgi?dbfrom=pubmed&retmode=ref&cmd=prlinks&id=26000844) doi: [10.1016/j.molcel.2015.05.004](https://doi.org/10.1016%2Fj.molcel.2015.05.004)

[35] Kazemi F, Najafabadi TA, Araabi BN. Automatic recognition of acute myelogenous leukemia in blood microscopic images using K-means clustering and support vector machine. [*J. Med. Signals Sens.*](https://www.ncbi.nlm.nih.gov/pmc/articles/PMC4973462/) 2016;6(3):183-193. doi:10.4103/2228-7477.186885
